# Supplementary material for: Evolutionary History of the GH3 Family Based on 48 Sequenced Plants and Identification of Jasmonic Acid-Relate GH3 Genes in <em>Solanum tuberosum</em>
Source: Preprints.org preprint supplement (doi:10.20944/preprints201805.0244.v1), 2018-05-17
Supplement: Supplementary file 1 [file Table S1.xlsx]

## Sheet: Tandem Duplication
Gene Name 1	Gene Name 2	Ka/Ks Value
Gorai.005G234200	Gorai.007G055900	0.0285741
Thecc1EG000723	Thecc1EG007172	0.0338016
Gorai.005G234200	Gorai.007G219500	0.0386646
Pm002438	Pm021243	0.0426852
ppa003126m	ppa003134m	0.0455233
Potri.007G050300	Potri.009G092900	0.0459963
Solyc01g107390.2	Solyc02g092820.2	0.0460915
Potri.001G298300	Potri.007G050300	0.0510287
Glyma.12G141000	Glyma.12G197800	0.0510363
Gorai.002G079500	Gorai.005G208000	0.0518587
Bo1g048130	Bo7g111320	0.0528717
Glyma.06G260800	Glyma.12G141000	0.0568945
Glyma.12G197800	Glyma.13G284600	0.0570816
Phvul.005G089200	Phvul.011G108500	0.0627656
PGSC0003DMC400043351	PGSC0003DMC400044853	0.0665043
Glyma.12G141000	Glyma.13G304000	0.0667136
Potri.001G410400	Potri.011G129700	0.0679516
AT4G27260	AT5G54510	0.069019
Gorai.005G234200	Gorai.013G048400	0.0691614
Carubv10004412m	Carubv10022833m	0.0693355
Glyma.13G284600	Glyma.13G304000	0.0698557
Gorai.007G219500	Gorai.013G048400	0.0700868
Solyc07g063850.2	Solyc10g006610.2	0.0706554
Gorai.005G234200	Gorai.008G021400	0.0710477
Brara.B01373	Brara.K00097	0.0717469
Carubv10004357m	Carubv10026098m	0.0725695
PGSC0003DMC400033488	PGSC0003DMC400037770	0.0729324
Bo2g041710	Bo7g111320	0.0734835
Glyma.12G197800	Glyma.12G216700	0.0737136
Thecc1EG007830	Thecc1EG031174	0.0759639
Brara.A01696	Brara.C01348	0.0761804
Glyma.12G141000	Glyma.13G284600	0.0771716
Gorai.008G021400	Gorai.013G048400	0.0799533
Glyma.06G260800	Glyma.12G216700	0.0814532
Eucgr.D02349	Eucgr.E00072	0.0817194
Potri.001G298300	Potri.009G092900	0.0817631
Glyma.06G260800	Glyma.13G284600	0.0818522
AT2G23170	AT4G37390	0.082185
PGSC0003DMC400033488	PGSC0003DMC400043415	0.0826406
Brara.C01348	Brara.K00097	0.0840779
Phvul.005G089200	Phvul.011G153400	0.084553
Bo2g011190	Bo9g167830	0.0855422
Glyma.12G216700	Glyma.13G304000	0.0873424
Bo3g022080	Bo7g111320	0.0875046
Glyma.01G190600	Glyma.11G051600	0.0876359
Glyma.12G141000	Glyma.12G216700	0.0883637
NNU_014411-RA	NNU_022048-RA	0.0884841
Glyma.06G301000	Glyma.12G216700	0.0891976
cl__Cla013990	cl__Cla013991	0.0898951
Eucgr.H02264	Eucgr.I00740	0.0910578
bo__Bo2g011190	bo__Bo2g011210	0.091788
Achn240911	Achn261851	0.0920897
NNU_002145-RA	NNU_020505-RA	0.0956279
Bo3g039200	Bo4g009300	0.0982449
Solyc01g095580.2	Solyc05g050280.2	0.0991345
Brara.A00146	Brara.I04544	0.100701
Glyma.03G256200	Glyma.16G026900	0.101057
Bo4g009300	Bo4g196110	0.103533
NNU_015023-RA	NNU_021059-RA	0.103632
Glyma.02G154600	Glyma.10G019700	0.103986
16958934	16958935	0.104106
Pbr021158.1	Pbr027334.1	0.104437
Bo1g004760	Bo8g100590	0.104867
Gorai.001G156600	Gorai.007G106500	0.105059
Glyma.12G103500	Glyma.12G216700	0.107017
Brara.G00820	Brara.I02972	0.10762
Pbr015325.1	Pbr025212.1	0.109198
PGSC0003DMC400000215	PGSC0003DMC400056257	0.109265
Gorai.004G152800	Gorai.007G106500	0.110604
Glyma.11G051600	Glyma.17G165300	0.112596
Glyma.16G026900	Glyma.19G254000	0.112733
br__Brara.J02096	br__Brara.J02099	0.117686
Glyma.12G216700	Glyma.13G284600	0.117921
Glyma.03G256200	Glyma.07G057900	0.118601
Gorai.002G017500	Gorai.013G074800	0.11869
Achn012711	Achn363991	0.118723
Glyma.01G190600	Glyma.17G165300	0.120922
16043042	16064063	0.12206
Scf00107.g8788	Scf00145.g10433	0.123351
Brara.D02794	Brara.E00140	0.124812
NNU_003263-RA	NNU_003921-RA	0.125481
Brara.C02329	Brara.D02794	0.126742
Glyma.01G190600	Glyma.05G101300	0.127078
Glyma.05G101300	Glyma.11G051600	0.128878
Medtr2g081860	Medtr8g467000	0.129178
Potri.002G168200	Potri.014G095500	0.1294
Bo3g009110	Bo9g167830	0.13215
Glyma.07G057900	Glyma.19G254000	0.132523
Brara.B00485	Brara.J02099	0.132724
Phvul.006G110900	Phvul.010G111400	0.13433
Brara.C00559	Brara.J02099	0.134422
br__Brara.B00485	br__Brara.B00487	0.136643
Solyc01g095580.2	Solyc10g009600.1	0.139151
Phvul.002G014400	Phvul.003G238700	0.139782
16043042	16044498	0.140458
10000575m	10002450m	0.140964
5G13320	5G13350	0.144209
Potri.001G069000	Potri.003G161300	0.144675
Glyma.12G103500	Glyma.12G197800	0.14471
Glyma.03G256200	Glyma.19G254000	0.145759
Glyma.06G301000	Glyma.12G103500	0.146842
Achn275921	Achn283101	0.148789
Glyma.06G301000	Glyma.12G197800	0.150087
Phvul.005G106500	Phvul.011G113000	0.150773
5G13320	5G13360	0.153415
bo__Bo9g166800	bo__Bo9g167830	0.156346
Glyma.12G197800	Glyma.13G304000	0.15813
Glyma.07G057900	Glyma.16G026900	0.160679
Phvul.005G111000	Phvul.011G108500	0.162468
Glyma.12G103500	Glyma.13G304000	0.164221
Glyma.06G301000	Glyma.13G304000	0.164894
5G13320	5G13370	0.169359
10000575m	10000528m	0.174862
Brara.B01556	Brara.C01476	0.177488
bo__Bo3g009110	bo__Bo3g009140	0.183044
Potri.013G144300	Potri.019G103500	0.185693
Glyma.12G108900	Glyma.13G299700	0.186711
Medtr7g117110	Medtr8g027920	0.188532
Glyma.06G296500	Glyma.13G299700	0.191275
5G13320	5G13380	0.191365
br__Brara.C00559	br__Brara.C00561	0.191616
Pbr018629.1	Pbr037834.1	0.192982
Glyma.05G101300	Glyma.17G165300	0.194213
16043042	16042067	0.211113
gr__Gorai.009G383300	gr__Gorai.009G383400	0.212608
16043042	16061310	0.21376
Glyma.06G296500	Glyma.12G108900	0.219592
ci__orange1.1g007728m	ci__orange1.1g007532m	0.229585
10000575m	10003724m	0.238282
ta__Thecc1EG008292	ta__Thecc1EG008297	0.244063
br__Brara.F00407	br__Brara.F00408	0.247992
137961	79313	0.256782
137961	79313	0.256782
Brara.B00487	Brara.J02096	0.257067
10012638m	10011356m	0.257871
sl__Solyc10g011650.2	sl__Solyc10g011660.2	0.259005
Bo2g050470	Bo3g023700	0.274809
Potri.011G129700	Potri.013G144300	0.276505
gr__Gorai.007G106500	gr__Gorai.007G106600	0.278119
5G13360	5G13380	0.28125
Gorai.007G323400	Gorai.009G381700	0.282172
bo__Bo7g116220	bo__Bo7g116230	0.282898
Bo2g011210	Bo9g166800	0.283131
10012638m	10008708m	0.283447
10000528m	10003724m	0.287248
10012638m	10011685m	0.28888
StGH3-8	StGH3-9	0.290427
ta__Thecc1EG031557	ta__Thecc1EG031565	0.292219
Brara.C00561	Brara.J02096	0.295816
5G13360	5G13370	0.29673
StGH3-8	StGH3-10	0.298874
Bo3g009140	Bo9g166800	0.299949
sl__Solyc10g009640.1	sl__Solyc10g011660.2	0.300501
mt__Medtr8g027920	mt__Medtr8g027955	0.302472
16044498	16042067	0.311486
sl__Solyc10g009640.1	sl__Solyc10g011650.2	0.312139
mt__Medtr8g027920	mt__Medtr8g027965	0.312733
Bo1g008000	Bo7g116220	0.312783
mt__Medtr8g027920	mt__Medtr8g027970	0.319114
16044498	16061310	0.321756
10002450m	10003724m	0.32334
16064063	16044498	0.325823
10002450m	10000528m	0.330387
StGH3-9	StGH3-10	0.332575
br__Brara.F00701	br__Brara.F00702	0.332985
5G13370	5G13380	0.338876
at__AT1G48660	at__AT1G48670	0.339429
5G13350	5G13360	0.344373
ta__Thecc1EG31548	ta__Thecc1EG31553	0.345423
ta__Thecc1EG31548	ta__Thecc1EG31554	0.350148
16064063	16061310	0.35237
16064063	16042067	0.353888
ta__Thecc1EG31550	ta__Thecc1EG31553	0.361083
gr__Gorai.007G323400	gr__Gorai.007G323500	0.366021
mt__Medtr8g027965	mt__Medtr8g027970	0.369159
ta__Thecc1EG31550	ta__Thecc1EG31554	0.374809
gr__Gorai.007G323500	gr__Gorai.007G323600	0.381015
10011356m	10011685m	0.384017
5G13350	5G13380	0.386068
10008708m	10011356m	0.396047
Brara.F00701	Brara.I05217	0.402164
5G13350	5G13370	0.403365
mt__Medtr8g027955	mt__Medtr8g027970	0.421451
gr__Gorai.007G323400	gr__Gorai.007G323600	0.426377
gr__Gorai.012G029900	gr__Gorai.012G030000	0.433735
ta__Thecc1EG31548	ta__Thecc1EG31550	0.446848
mt__Medtr8g027955	mt__Medtr8g027965	0.448427
10008708m	10011685m	0.452692
16042067	16061310	0.458065
sl__Solyc10g009600.1	sl__Solyc10g009620.1	0.458092
br__Brara.I05217	br__Brara.I05219	0.464708
gr__Gorai.012G029900	gr__Gorai.012G030200	0.469534
sl__Solyc10g009600.1	sl__Solyc10g009610.1	0.472678
bo__Bo8g10	bo__Bo8g10	0.486588
br__Brara.I05218	br__Brara.I05219	0.486979
sl__Solyc10g009610.1	sl__Solyc10g009620.1	0.487472
gr__Gorai.012G030000	gr__Gorai.012G030200	0.492327
bo__Bo8g10	bo__Bo8g10	0.49711
br__Brara.I05217	br__Brara.I05218	0.503871
gr__Gorai.009G381700	gr__Gorai.009G382000	0.506148
bo__Bo8g10	bo__Bo8g10	0.545557
mt__Medtr7g094190	mt__Medtr7g094330	0.57571
gr__Gorai.012G029800	gr__Gorai.012G029900	0.598525
gr__Gorai.012G029800	gr__Gorai.012G030000	0.620728
bo__Bo8g10	bo__Bo8g10	0.63108
bo__Bo8g10	bo__Bo8g10	0.664408
bo__Bo8g10	bo__Bo8g10	0.671875
gr__Gorai.012G029800	gr__Gorai.012G030200	0.80791
ta__Thecc1EG31553	ta__Thecc1EG31554	1.76471

## Sheet: Segmental Duplication
Gene Name 1	Gene Name 2	Ka/Ks Value
p5_sc00160.V1.gene257	p5_sc00410.V1.gene69	0.0855424
GSMUA_Achr7G24600	GSMUA_Achr8G25040	0.0892585
p5_sc00018.V1.gene295	p5_sc00050.V1.gene219	0.0959634
GSMUA_Achr4G03370	GSMUA_Achr4G07220	0.0977131
GSMUA_Achr3G32010	GSMUA_Achr4G08460	0.0978324
GSMUA_Achr4G08460	GSMUA_Achr7G24600	0.098962
GSMUA_Achr4G15630	GSMUA_Achr7G24600	0.109387
GSMUA_Achr3G32010	GSMUA_Achr4G15630	0.11193
GSMUA_Achr4G08460	GSMUA_Achr4G15630	0.112601
GRMZM2G091276	GRMZM2G162413	0.116647
GSMUA_Achr3G30210	GSMUA_Achr4G07220	0.128747
GSMUA_Achr4G07220	GSMUA_Achr7G26370	0.134964
GSMUA_Achr3G32010	GSMUA_Achr8G25040	0.139078
GSMUA_Achr3G32010	GSMUA_Achr7G24600	0.151759
GSMUA_Achr2G13480	GSMUA_Achr4G32720	0.154181
GSMUA_Achr3G30210	GSMUA_Achr4G03370	0.155418
GSMUA_Achr6G00590	GSMUA_Achr7G00150	0.16049
GSMUA_Achr4G03370	GSMUA_Achr7G26370	0.170781
GSMUA_Achr3G30210	GSMUA_Achr7G26370	0.190454
GSMUA_Achr4G32720	GSMUA_Achr5G01550	0.215617
GSMUA_Achr3G30210	GSMUA_Achr4G32720	0.259155
LOC_Os01g57610	LOC_Os05g42150	0.280674
Bradi2g20740	Bradi2g52000	0.348223
os__LOC_Os07g38860	os__LOC_Os07g38890	0.381969
GRMZM2G053338	GRMZM2G378106	0.460526
GSMUA_Achr7G24600	GSMUA_Achr7G24610	0.473698
GRMZM2G001421	GRMZM2G061005	0.507971
zm__GRMZM2G061005	zm__GRMZM2G060991	0.559976
