# Supplementary material for: Evolutionary History of the GH3 Family Based on 48 Sequenced Plants and Identification of Jasmonic Acid-Relate GH3 Genes in <em>Solanum tuberosum</em>
Source: Preprints.org preprint supplement (doi:10.20944/preprints201805.0244.v1), 2018-05-17
Supplement: Supplementary file 2 [file Table S2.xlsx]

## Sheet: RNA-seq database
	Salt	Mannitol	BAP	ABA	IAA	GA3	Heat	P. infestans	BABA	BTH
StGH3-1	-0.172871	0.000687592	-2.4922	-1.06511	-0.216441	-0.0955932	0.728927	0.178888	0.422497	-1.07984
StGH3-2	0.506207	0.150413	-0.865384	-0.534722	1.62709	0.380698	2.81745	-1.16448	3.0167	1.22326
StGH3-3	-0.12332	0.845281	-2.81093	1.14557	0.600905	0.46607	-2.75475	-0.796251	0.056379	-0.965184
StGH3-4	-0.957479	-0.141128	-2.79643	1.2082	1.71946	-0.716162	-3.05889	-0.993218	0.660816	-2.9142
StGH3-5	-0.0600419	-0.273127	-2.22277	0.0305831	-0.208767	-0.432361	0.395052	0.332588	-0.855144	0.129028
StGH3-6	0.890136	-0.734327	-0.571467	0.0282195	0.489586	1.40623	2.16986	-3.98801	-3.98801	-3.98801
StGH3-7	0.0605534	-0.200065	-2.37164	0.0961898	-0.327824	0.0144361	-2.85428	-0.518139	1.62846	-1.32364
StGH3-8	2.78847	2.73036	-1.81093	0.29356	-0.243379	-0.252733	1.3097	-0.0195007	0.664061	-0.772541
StGH3-9	-0.362369	-0.425545	-2.2616	-0.650331	-0.496408	-0.429375	1.20659	0.499966	-0.64009	0.325405
StGH3-10	-0.350837	-0.455681	-2.12833	-0.549606	-0.141276	-0.0902178	3.16889	-0.0561129	-2.7698	0.170396
StGH3-11	1.19979	0.994839	-2.0215	-1.64201	0.0972705	-0.204267	-0.306469	-0.317944	-3.98801	1.43336
StGH3-12	-0.389984	-0.42899	-2.26159	1.59958	0.04851	0.276484	0.927983	0.206676	-0.19084	1.33153
StGH3-13	0.219625	0.986424	-1.41025	-0.175618	-0.233169	0.193578	-3.98801	-1.11904	1.39742	2.39471
