# Supplementary material for: Evolutionary History of the GH3 Family Based on 48 Sequenced Plants and Identification of Jasmonic Acid-Relate GH3 Genes in <em>Solanum tuberosum</em>
Source: Preprints.org preprint supplement (doi:10.20944/preprints201805.0244.v1), 2018-05-17
Supplement: Supplementary file 3 [file Table S3.xlsx]

## Sheet: the expression of MeJA
	GH3-1		GH3-5		GH3-11		GH3-12
	2-DDCt	SD	2-DDCt	SD	2-DDCt	SD	2-DDCt	SD
0h	1.00028	0.0286829	1.01324	0.199841	1.0152	0.206252	1.00591	0.136212
1h	0.867931	0.0799886	0.141528	0.0133587	0.206915	0.0539069	2.00663	0.317469
6h	1.52516	0.1373	1.67717	0.0783821	0.810213	0.0815506	7.93897	0.542548
12h	1.28847	0.116225	1.58563	0.0176142	0.698326	0.0743352	5.21583	0.501289
24h	1.32562	0.0785202	0.859442	0.099533	1.45025	0.0760057	4.24776	0.507679

## Sheet: the expression of tissues
	GH3-1		GH3-5		GH3-11		GH3-12
	2-DDCt	SD	2-DDCt	SD	2-DDCt	SD	2-DDCt	SD
Young Leaf	1.00866	0.160974	1.00168	0.0718802	1.00065	0.0441213	1.02891	0.299513
Young Stem	0.629238	0.225227	0.497765	0.172544	3.09284	0.474246	3.3266	0.846466
Young Root	2.59457	0.0569615	0.491237	0.0536984	0.263694	0.134906	0.768483	0.108575
Stolon	0.140373	0.00939007	0.0566879	0.0324716	6.53331	0.635945	0.0675378	0.0249129
Young tuber	0.0163845	0.00128295	0.0581927	0.0121696	0.3334	0.0304204	0.01416	0.00439879
Mature tuber	0.0356096	0.00236661	0.0613213	0.00353902	0.344314	0.0207701	0.0123283	0.001672
Flower	6.05624	0.266878	0.669059	0.345581	7.82807	1.2612	5.39429	1.01743
